CORRECTION

# Correction: Early warning of regime switching in a financial time series: A heteroskedastic network model

Linxi Wang, Sufang An, Zhiliang Dong, Xiaojuan Dong, Jiapei Li

The second and third authors, Sufang An and Zhiliang Dong, should be noted as shared co-corresponding authors on this work. Zhiliang Dong's email address is: [dongzhl@126.com](mailto:dongzhl@126.com).

## Reference

1. Wang L, An S, Dong Z, Dong X, Li J. Early warning of regime switching in a financial time series: A heteroskedastic network model. PLoS One. 2025;20(10):e0333734. <https://doi.org/10.1371/journal.pone.0333734> PMID: [41061022](https://pubmed.ncbi.nlm.nih.gov/41061022/)

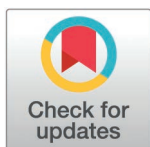

## OPEN ACCESS

**Citation:** Wang L, An S, Dong Z, Dong X, Li J (2025) Correction: Early warning of regime switching in a financial time series: A heteroskedastic network model. PLoS One 20(12): e0339698. <https://doi.org/10.1371/journal.pone.0339698>

**Published:** December 23, 2025

**Copyright:** © 2025 Wang et al. This is an open access article distributed under the terms of the [Creative Commons Attribution License](https://creativecommons.org/licenses/by/4.0/), which permits unrestricted use, distribution, and reproduction in any medium, provided the original author and source are credited.
